# Supplementary material
Source: Springer Nature journal article supplement (https://www.springermedizin.de/resource/supplementary/12889_2008_1302_MOESM2_ESM.pdf/9502900)

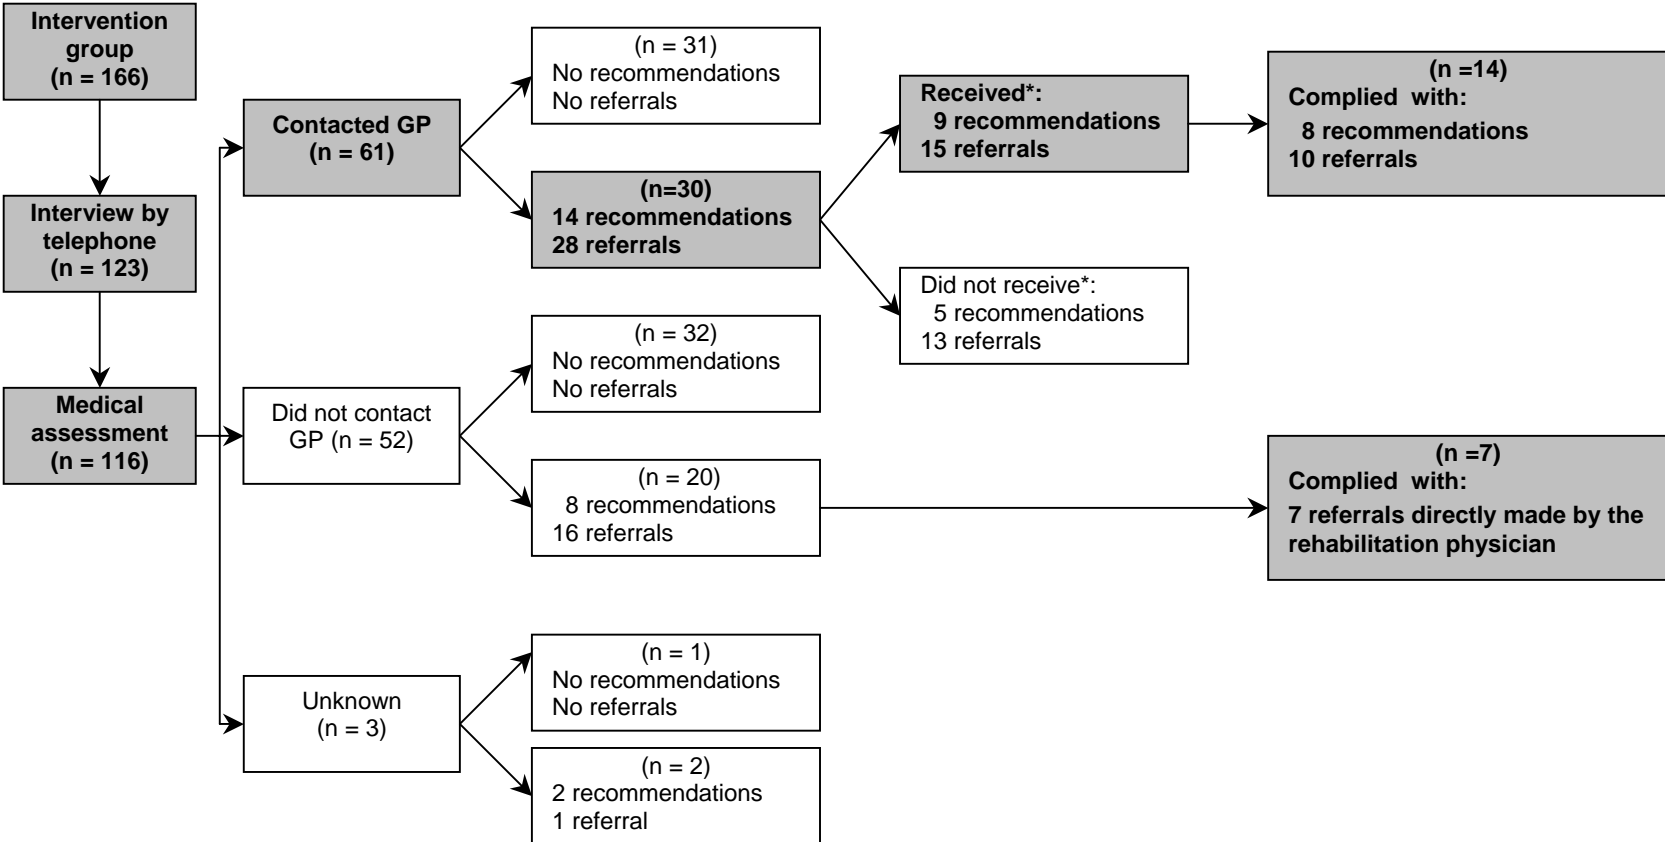

Supplement: MOESM2 [file 9502900]
